# Supplementary material for: Clinical Implications of Oral Assessment In Elderly Patients With Acute Heart Failure: A Single-Center, Retrospective Study
Source: Research Square preprint supplement (doi:10.21203/rs.3.rs-66811/v3), 2021-12-08
Supplement: Supplementary file 1 [file 514a6ec2f687b8603a700221.docx]

**Table S1. Details of ROAG evaluation of the enrolled patients**

| Items | Evaluation (score) | | |
| --- | --- | --- | --- |
| Normal (1) | Minor problems (2) | Severe problems (3) |
| voice | 47 | 27 | 3 |
| lips | 41 | 36 | 0 |
| mucous membranes | 75 | 2 | 0 |
| tongue | 60 | 17 | 0 |
| gums | 73 | 4 | 0 |
| teeth/dentures | 62 | 13 | 2 |
| saliva | 58 | 11 | 8 |
| swallowing | 65 | 10 | 2 |

Data are presented as number of patients. ROAG, revised oral assessment guide.
